# Supplementary material for: Hollow Engineering of Core-Shell Fe3O4@MoS2 Microspheres with Controllable Interior toward Optimized Electromagnetic Attenuation
Source: Research Square preprint supplement (doi:10.21203/rs.3.rs-6546742/v1), 2025-06-02
Supplement: Supplementary file 1 [file 721f512e8b0c6bad08ee94e0.docx]

Hollow Engineering of Core-Shell Fe3O4@MoS2 Microspheres with

Controllable Interior toward Optimized Electromagnetic Attenuation

Na Chen1, Ru-Yu Wang1, Xue-Feng Pan1, Bing-Bing Han1, Jia-Xin Li1, Zhen-Jie Guan3, Jian-Tang Jiang3, Kang-Jun Wang*,1, Xiao-Guang San*,1, and Panbo Liu*,2

1 College of Chemical Engineering, Shenyang University of Chemical Technology, Shenyang 110142, China

2 School of Chemistry and Chemical Engineering, Northwestern Polytechnical University, Xi’an 710129, China

3 School of Materials Science and Engineering, Harbin Institute of Technology, Harbin, 150001, China

**Corresponding Authors****:**

E-mail address: wangkj_dut@syuct.edu.cn, sanxiaoguang@syuct.edu.cn, liupanbo@nwpu.edu.cn

**2.** **Experimental**

**2.1 Chemicals**

Ferric chloride hexahydrate (FeCl3·6H2O), tetraethyl orthosilicate (TEOS), tetrabutyl titanate (TBOT), ethylene glycol (EG), urea (CO(NH2)2), ammonium hydroxide solution (NH3·H2O, 28 wt%), sodium molybdate (Na2MoO4 2H2O), thiourea (CH4N2S), acetonitrile, and ethanol were acquired from Sinopharm Chemical Reagent Co., Ltd. Tetrabutylammonium bromide (TBAB) was supplied by Shanghai Macklin Biochemical Co., Ltd.

**2.2 Synthesis of Fe3O4**

A simple and efficient solvothermal method was used to fabricate the Fe3O4 microspheres. Briefly, 1.35 g of FeCl3·6H2O, 5.4 g of CO(NH2)2, and 3.6 g of TBAB were sequentially dissolved in 75 mL of EG with the aid of vigorous stirring and ultrasonication. Then the resulting solution was shifted into a Teflon-lined autoclave, and heated to 200 °C for 10 h. After natural cooling to room temperature, the product was collected, washed with deionized water and ethanol for several times, and dried at 60 °C overnight.

**2.2 Synthesis of Fe3O4@MoS2**

0.6 g of Na2MoO4·2H2O and 0.6 g of CH4N2S were dissolved in a solution consisting of ethanol (35 mL) and deionized water (35 mL) with ultrasonic treatment for 1 h. After adding 0.5 g of Fe3O4 to the above solution by ultrasonic treatment for 1 h, 0.3 g of CTAB was added to the mixed solution with stirring until it is completely dispersed. After that, the solution was transferred into a 150 mL Teflon-lined stainless-steel autoclave and heated at 200 °C for 24 h. The precipitation was collected, washed with ethanol and deionized water several times and dried at 60 °C overnight.

**2.4 Characterization**

The crystal structure of the samples was carried out on a Bruker D8 ADVANCED X-ray diffractometer (XRD). The morphology of the samples was observed using a Hitachi SU8100 scanning electron microscope (SEM) and a FEI TECNAI G2F20 transmission electron microscope (TEM) equipped with a high-resolution transmission electron microscope (HR-TEM). The surface chemical states were acquired using an Escalab Xi X-ray photoelectron spectroscopy (XPS). The electron paramagnetic resonance (EPR) spectra is performed on a Bruker EMXPLUS spectrometer at room temperature. The magnetic hysteresis loops were recorded with a LakeShore 7404 vibrating sample magnetometer (VSM) at room temperature. The electromagnetic parameters were measured through an Agilent N5230A vector network analyzer (VNA) from 2 to 18 GHz. For testing, the 70 wt% sample was uniformly dispersed in paraffin and pressed into coaxial rings with outer diameter of 7.00 mm, inner diameter of 3.04 mm and thickness of 3.00 mm. The sample’s microwave absorbing properties were calculated through the transmission line theory.

**2.4 DFT calculations**

The spin-polarized density functional theory (DFT) calculations are carried out in the Vienna ab initio simulation package (VASP) based on the plane-wave basis sets with the projector augmented-wave method. The exchange-correlation potential is treated by using a generalized gradient approximation (GGA) with the Perdew-Burke-Ernzerhof (PBE) parametrization. The van der Waals correction of Grimme’s DFT-D3 model is also adopted. The energy cutoff is set to be 450 eV. The Fe3O4 (111) and MoS2 (001) form a heterojunction, lattice parameters are a = 12.2 Å, b = 12.2 Å, and c = 32.8 Å. 2 × 2 × 1 Gamma k-point sampling is used for the Brillouin zone integration. The structures are fully relaxed until the maximum force on each atom was less than 0.02 eV/Å, and the energy convergent standard was 10-5 eV.


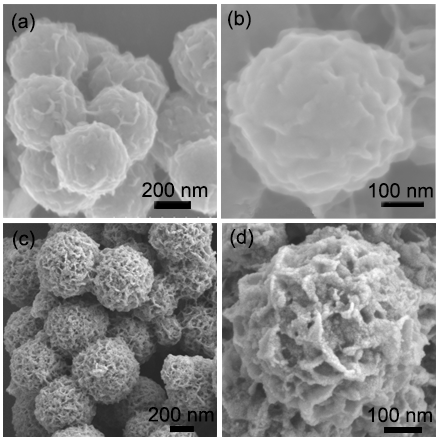


**Fig. S1** SEM images of **a, b** Fe3O4@MoS2-1 and **c, d** Fe3O4@MoS2-3.


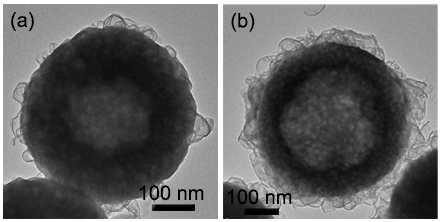


**Fig. S2** TEM images of **a** Fe3O4@MoS2-1 and **b** Fe3O4@MoS2-3.





**Fig. S3** Dielectric loss tangent of Fe3O4−1, Fe3O4−2, Fe3O4−3 and Fe3O4−4.


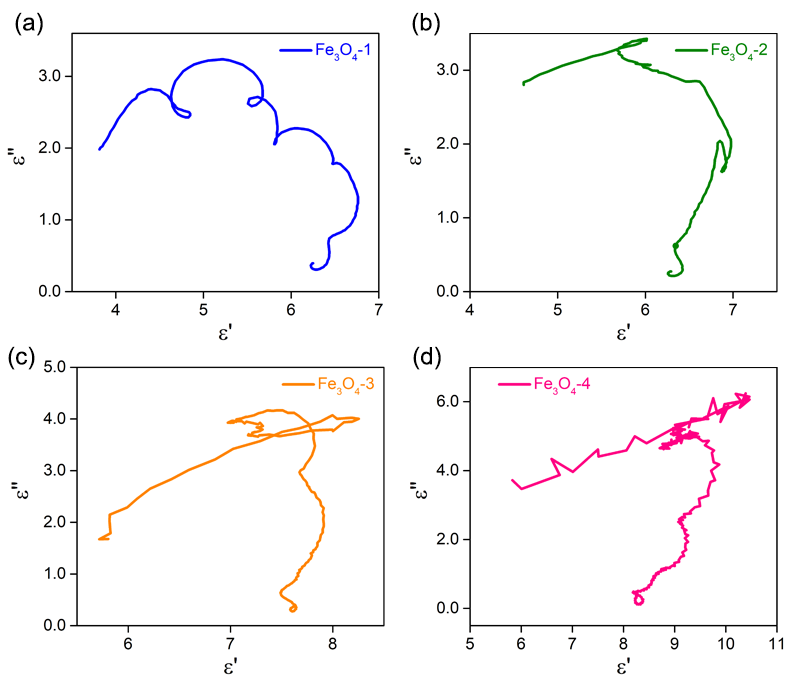


**Fig. S4** Cole–Cole curves of **a** Fe3O4−1, **b** Fe3O4−2, **c** Fe3O4−3 and **d** Fe3O4−4.





**Fig. S5** Themagnetic loss tangent of Fe3O4−1, Fe3O4−2, Fe3O4−3 and Fe3O4−4.





**Fig. S6** TheC0 curves of Fe3O4−1, Fe3O4−2, Fe3O4−3 and Fe3O4−4.





**Fig. S7** Theattenuation coefficient (𝛼) of Fe3O4−1, Fe3O4−2, Fe3O4−3 and Fe3O4−4.


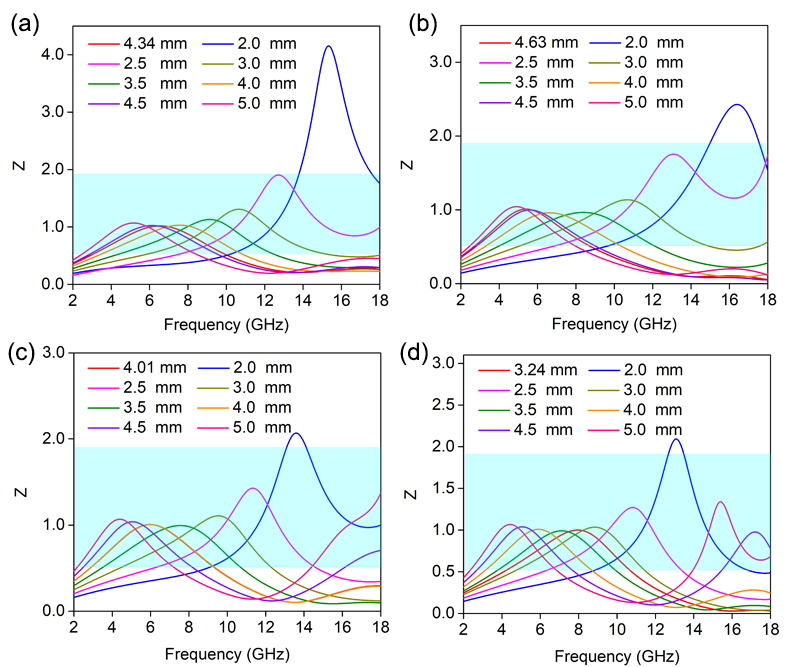


**Fig. S8** The impedance matching of **a** Fe3O4−1, **b** Fe3O4−2, **c** Fe3O4−3 and **d** Fe3O4−4.


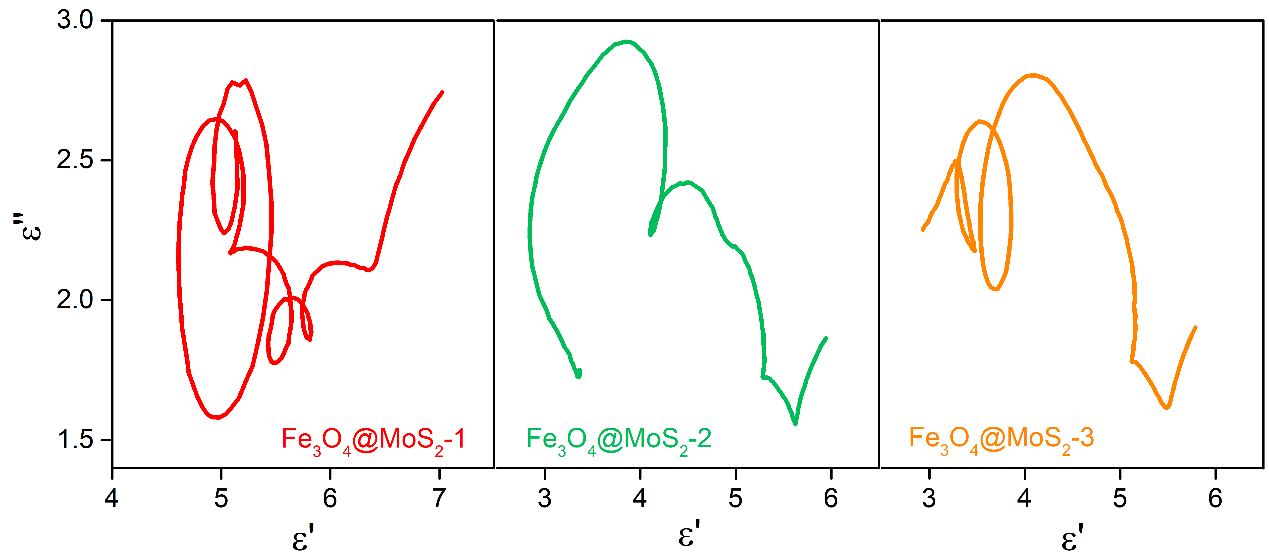


**Fig. S9** TheCole−Cole curves of Fe3O4@MoS2−1, Fe3O4@MoS2−2 and Fe3O4@MoS2−3.


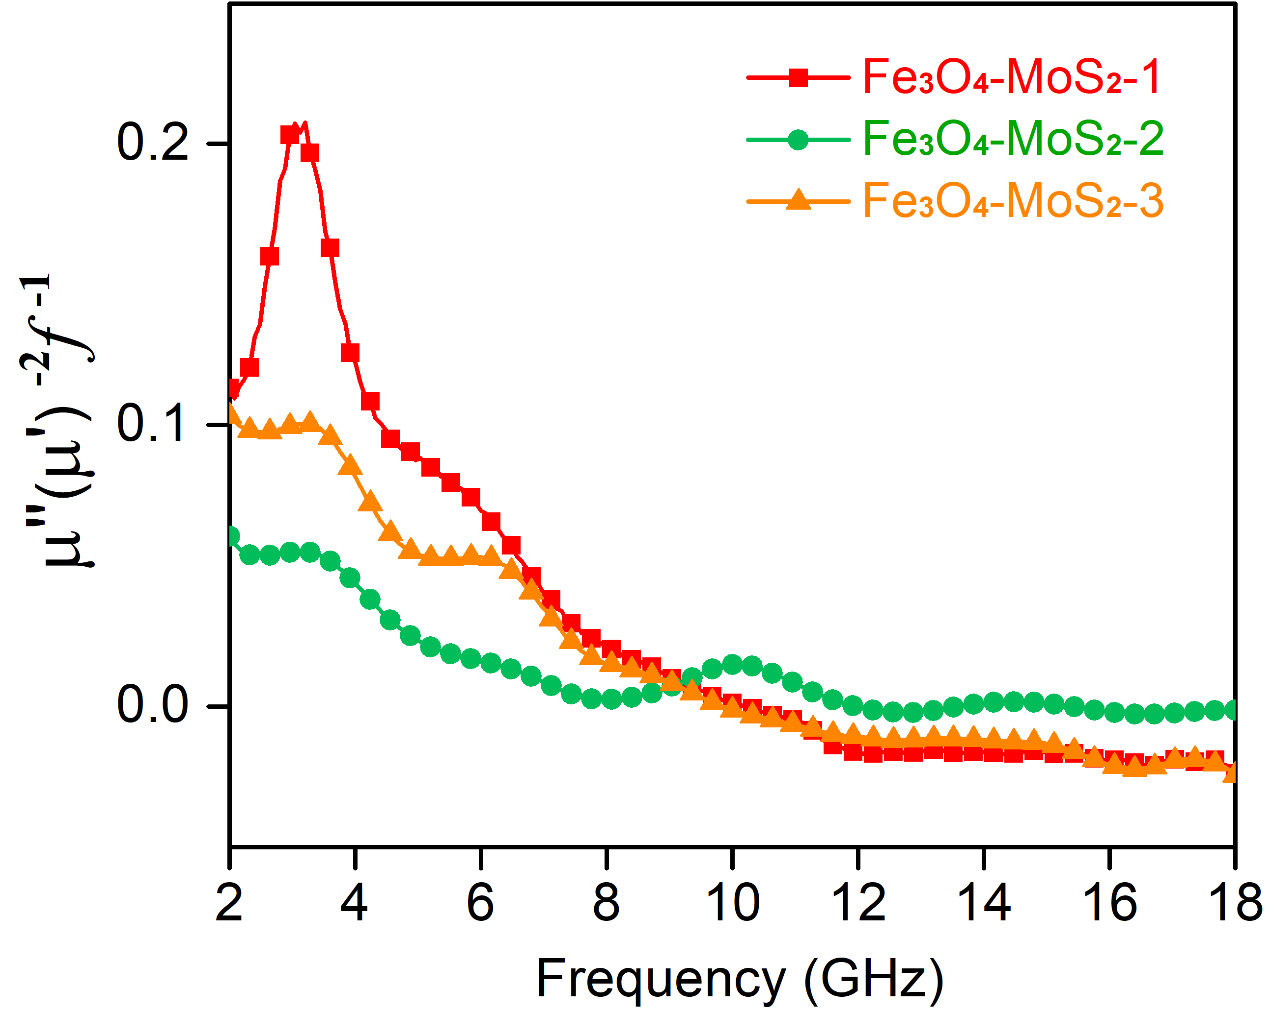


**Fig. S10** TheC0 values of Fe3O4@MoS2−1, Fe3O4@MoS2−2 and Fe3O4@MoS2−3.


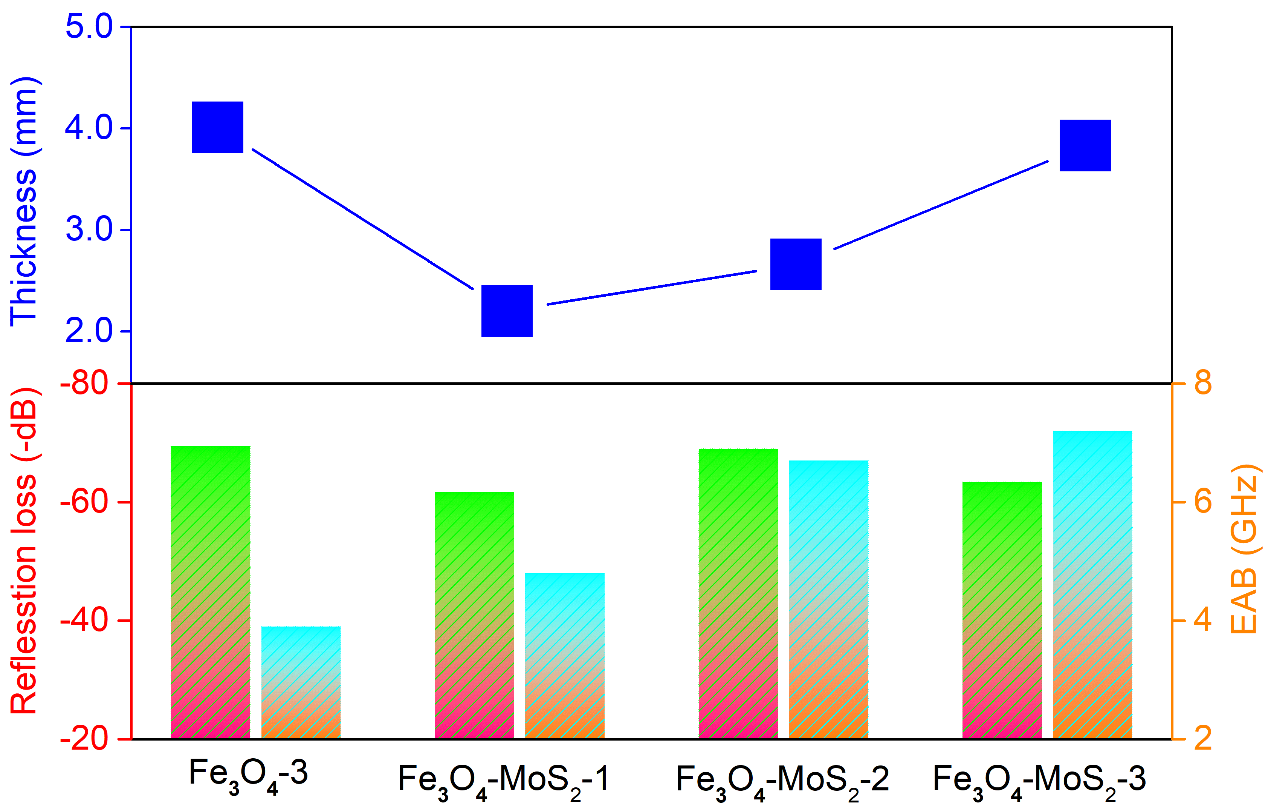


**Fig. S11** The minimum *RL*, corresponding EAB, and matching thickness for Fe3O4−3 and a series of Fe3O4@MoS2.
